# Supplementary material for: Cell Immobilization for Erythritol Production
Source: MDPI journal article supplement (doi:10.3390/jof8121286), 2022-12-08
Supplement: s1 [file s1]

**Table S1.** Initial sugar concentrations of fermentation broths (immediately after inoculation) for each experiment. Note: Broths contain grape must (carbon source), yeast extract or ammonium sulphate (nitrogen source) and microorganisms.

| Experiment                                                      | Glucose (g/L)     | Fructose (g/L)     | Total Sugars (g/L) |
|-----------------------------------------------------------------|-------------------|--------------------|--------------------|
| Strain comparison (in flasks)                                   | 118.95            | 121.20             | 240.15             |
| Adjustment of yeast extract dose (in flasks)                    | 119.81            | 113.99             | 233.8              |
| Combinations of yeast extract and ammonium sulphate (in flasks) | 116.94            | 126.33             | 243.27             |
| Free-cell fermentation (bioreactor), $n = 4$                    | $114.36 \pm 2.59$ | $122.02 \pm 4.83$  | $236.38 \pm 7.12$  |
| Immobilized fermentation (bioreactor), $n = 4$                  | $114.39 \pm 7.27$ | $119.34 \pm 10.85$ | $233.73 \pm 18.10$ |

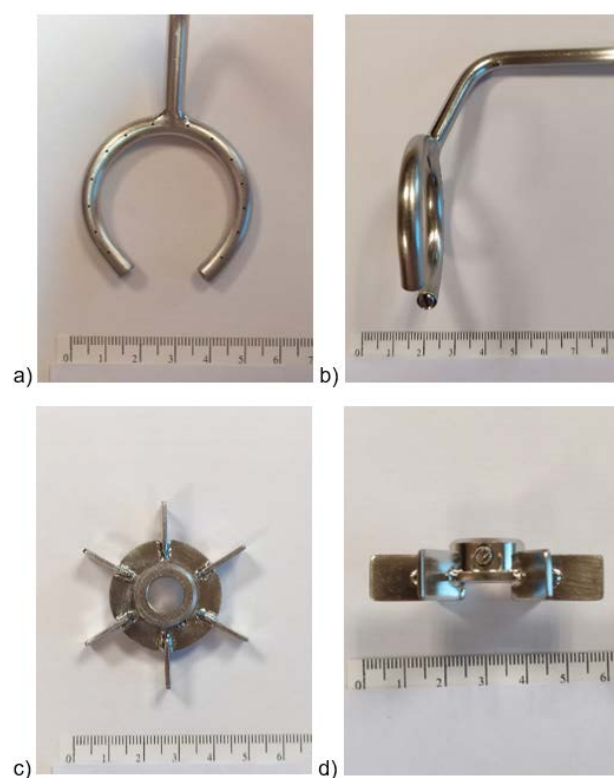

**Figure S1.** Photographs of (a, b) the sparger and (c, d) the rotor blades of the bioreactor. Note: The ruler shows centimeters.

**Table S2.** Fermentation parameters of grape must with five different fungal strains in flask experiments after 120 h (average  $\pm$  standard deviation;  $n = 3$ ). Nitrogen source: 6.7 g/L yeast extract. Note: For each column, letters between parentheses (a, b, c, d) indicate the existence of statistical differences ( $p < 0.05$ ; Tukey HSD test) among strains; if two strains share the same letter, there are no significant differences between them for that parameter.

| Strain                                          | C <sub>X</sub> ( $\times 10^8$ cells/mL) | C <sub>ETH</sub> (g/L) | C <sub>ERY</sub> (g/L) | C <sub>GLY</sub> (g/L) | C <sub>MAN</sub> (g/L) | $\Delta G$ (%)  | $\Delta F$ (%)       | $\Delta S$ (%)       | Y <sub>ETH</sub> (g/g)                                 | Y <sub>ERY</sub> (g/g)                                | Y <sub>GLY</sub> (g/g)                                | Y <sub>MAN</sub> (g/g)                                |
|-------------------------------------------------|------------------------------------------|------------------------|------------------------|------------------------|------------------------|-----------------|----------------------|----------------------|--------------------------------------------------------|-------------------------------------------------------|-------------------------------------------------------|-------------------------------------------------------|
| <i>M. acetoabutens</i> DSM 3551                 | 4.38 $\pm$ 0.49 (ab)                     | 2.74 $\pm$ 1.15 (c)    | 7.85 $\pm$ 0.54 (d)    | 8.77 $\pm$ 1.55 (c)    | 0 $\pm$ 0 (a)          | 100 $\pm$ 0 (a) | 32.66 $\pm$ 1.91 (c) | 66.02 $\pm$ 0.96 (c) | 1.45 $\times 10^{-2}$ $\pm$ 5.92 $\times 10^{-3}$ (c)  | 4.16 $\times 10^{-2}$ $\pm$ 2.39 $\times 10^{-3}$ (d) | 4.65 $\times 10^{-2}$ $\pm$ 8.47 $\times 10^{-3}$ (c) | 0 $\pm$ 0 (a)                                         |
| <i>M. madida</i> CBS 240.79                     | 5.11 $\pm$ 0.59 (b)                      | 12.87 $\pm$ 2.04 (b)   | 58.05 $\pm$ 0.81 (b)   | 50.50 $\pm$ 0.20 (b)   | 1.74 $\pm$ 0.24 (b)    | 100 $\pm$ 0 (a) | 99.05 $\pm$ 0.06 (a) | 99.52 $\pm$ 0.03 (a) | 4.46 $\times 10^{-2}$ $\pm$ 6.92 $\times 10^{-3}$ (bd) | 2.01 $\times 10^{-1}$ $\pm$ 4.12 $\times 10^{-3}$ (b) | 1.75 $\times 10^{-1}$ $\pm$ 1.99 $\times 10^{-3}$ (b) | 6.04 $\times 10^{-3}$ $\pm$ 7.86 $\times 10^{-4}$ (b) |
| <i>M. megachi-liensis</i> CBS 567.85            | 7.63 $\pm$ 0.96 (c)                      | 8.54 $\pm$ 1.24 (a)    | 81.10 $\pm$ 1.92 (c)   | 10.09 $\pm$ 0.91 (c)   | 0 $\pm$ 0 (a)          | 100 $\pm$ 0 (a) | 90.87 $\pm$ 0.60 (b) | 95.39 $\pm$ 0.30 (b) | 3.16 $\times 10^{-2}$ $\pm$ 4.53 $\times 10^{-3}$ (ab) | 3.00 $\times 10^{-1}$ $\pm$ 5.89 $\times 10^{-3}$ (c) | 3.73 $\times 10^{-2}$ $\pm$ 3.35 $\times 10^{-3}$ (c) | 0 $\pm$ 0 (a)                                         |
| <i>M. pollinis</i> MUCL 40570                   | 2.80 $\pm$ 0.11 (a)                      | 7.48 $\pm$ 1.20 (a)    | 100.79 $\pm$ 3.35 (a)  | 2.44 $\pm$ 0.78 (a)    | 0 $\pm$ 0 (a)          | 100 $\pm$ 0 (a) | 97.04 $\pm$ 0.62 (a) | 98.51 $\pm$ 0.31 (a) | 2.66 $\times 10^{-2}$ $\pm$ 3.96 $\times 10^{-3}$ (ac) | 3.59 $\times 10^{-1}$ $\pm$ 7.50 $\times 10^{-3}$ (a) | 8.72 $\times 10^{-3}$ $\pm$ 2.88 $\times 10^{-3}$ (a) | 0 $\pm$ 0 (a)                                         |
| <i>M. suaveolens</i> var. <i>nigra</i> DSM 2552 | 3.58 $\pm$ 0.63 (ab)                     | 16.25 $\pm$ 1.45 (b)   | 49.85 $\pm$ 1.42 (e)   | 26.55 $\pm$ 2.67 (d)   | 0.23 $\pm$ 0.20 (a)    | 100 $\pm$ 0 (a) | 98.85 $\pm$ 0.25 (a) | 99.42 $\pm$ 0.12 (a) | 5.60 $\times 10^{-2}$ $\pm$ 4.94 $\times 10^{-3}$ (d)  | 1.72 $\times 10^{-1}$ $\pm$ 5.02 $\times 10^{-3}$ (e) | 9.16 $\times 10^{-2}$ $\pm$ 9.49 $\times 10^{-3}$ (d) | 7.83 $\times 10^{-4}$ $\pm$ 6.79 $\times 10^{-4}$ (a) |

C<sub>X</sub>: cell density in the liquid medium; C<sub>ETH</sub>: ethanol concentration; C<sub>ERY</sub>: erythritol concentration; C<sub>GLY</sub>: glycerol concentration; C<sub>MAN</sub>: mannitol concentration;  $\Delta G$ : glucose consumption,  $\Delta F$ : fructose consumption,  $\Delta S$ : total sugar consumption, Y<sub>ETH</sub>: ethanol yield, Y<sub>ERY</sub>: erythritol yield, Y<sub>GLY</sub>: glycerol yield; Y<sub>MAN</sub>: mannitol yield.

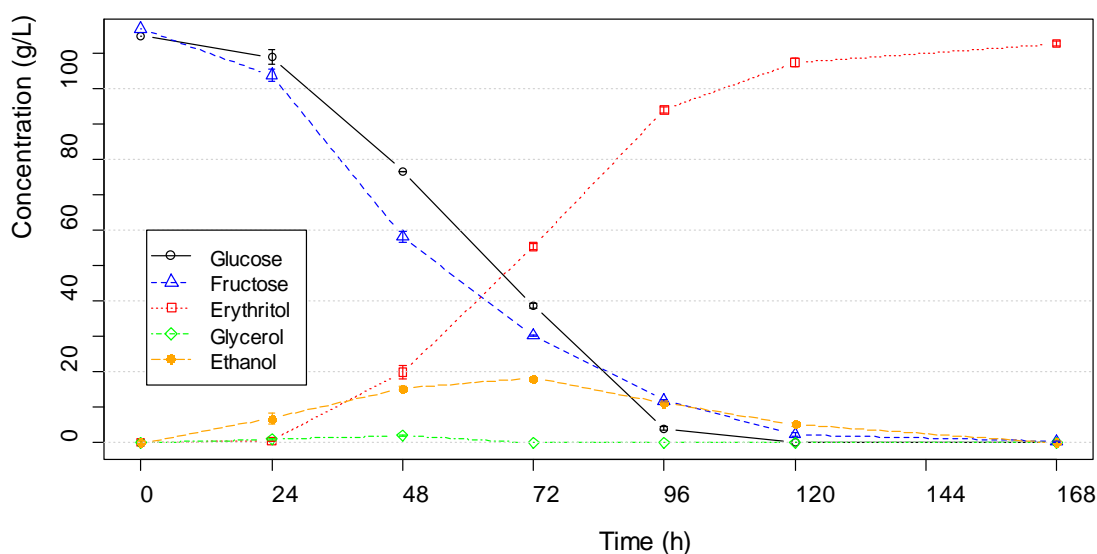

**Figure S2.** Evolution of grape must fermentation with *M. pollinis* MUCL 40570 in flask experiments under optimized nitrogen dosing (6.88 g/L yeast extract; equivalent to 0.76 g/L TN). Average values  $\pm$  standard deviations are shown ( $n = 2$ ).

**Table S3.** Fermentation parameters (120 h) for grape must in flask experiments with different combinations of yeast extract and ammonium sulphate as nitrogen sources (as described in Table 1 in the manuscript), using *M. pollinis* MUCL 40570 (average  $\pm$  standard deviation;  $n = 2$ ). Note: For each column, letters between parentheses (**a**, **b**, **c**, **d**) indicate the existence of statistical differences ( $p < 0.05$ ; Tukey HSD test) among treatments; if two treatments share the same letter, there are no significant differences between them for that parameter.

| Yeast extract (%) | Cell Density (cells/mL) $\times 10^8$ | $C_{ETH}$ (g/L)     | $C_{ERY}$ (g/L)      | $C_{GLY}$ (g/L)     | $\Delta G$ (%)       | $\Delta F$ (%)       | $\Delta S$ (%)       | $Y_{ETH}$ (g/g)                                   | $Y_{ERY}$ (g/g)                                   | $Y_{GLY}$ (g/g)                                   |
|-------------------|---------------------------------------|---------------------|----------------------|---------------------|----------------------|----------------------|----------------------|---------------------------------------------------|---------------------------------------------------|---------------------------------------------------|
| 100               | $2.69 \pm 0.31$ (a)                   | $5.62 \pm 2.35$ (a) | $89.12 \pm 0.50$ (a) | $1.29 \pm 0.16$ (d) | $100 \pm 0$ (a)      | $99.09 \pm 0.39$ (a) | $99.53 \pm 0.20$ (a) | $1.95 \times 10^{-2} \pm 7.96 \times 10^{-3}$ (a) | $3.10 \times 10^{-1} \pm 5.29 \times 10^{-3}$ (a) | $4.47 \times 10^{-3} \pm 6.16 \times 10^{-4}$ (d) |
| 80                | $2.34 \pm 0.22$ (a)                   | $5.27 \pm 1.96$ (a) | $89.93 \pm 1.19$ (a) | $0.79 \pm 0.14$ (d) | $100 \pm 0$ (a)      | $99.49 \pm 0.06$ (a) | $99.74 \pm 0.03$ (a) | $1.83 \times 10^{-2} \pm 6.76 \times 10^{-3}$ (a) | $3.10 \times 10^{-1} \pm 5.29 \times 10^{-3}$ (a) | $2.74 \times 10^{-3} \pm 4.86 \times 10^{-4}$ (d) |
| 60                | $2.14 \pm 0.07$ (a)                   | $6.91 \pm 3.05$ (a) | $90.17 \pm 0.49$ (a) | $1.54 \pm 0.19$ (d) | $100 \pm 0$ (a)      | $98.94 \pm 0.29$ (a) | $99.45 \pm 0.15$ (a) | $2.37 \times 10^{-2} \pm 1.06 \times 10^{-2}$ (a) | $3.09 \times 10^{-1} \pm 2.40 \times 10^{-6}$ (a) | $5.25 \times 10^{-3} \pm 6.25 \times 10^{-4}$ (d) |
| 40                | $2.13 \pm 0.31$ (a)                   | $4.86 \pm 1.91$ (a) | $89.73 \pm 0.02$ (a) | $2.85 \pm 0.49$ (c) | $100 \pm 0$ (a)      | $97.63 \pm 0.60$ (a) | $98.77 \pm 0.31$ (a) | $1.69 \times 10^{-2} \pm 6.47 \times 10^{-3}$ (a) | $3.13 \times 10^{-1} \pm 3.54 \times 10^{-3}$ (a) | $9.94 \times 10^{-3} \pm 1.83 \times 10^{-3}$ (c) |
| 20                | $1.80 \pm 0.11$ (a)                   | $4.52 \pm 0.47$ (a) | $78.67 \pm 2.54$ (b) | $4.10 \pm 0.05$ (b) | $99.88 \pm 0.10$ (a) | $93.36 \pm 1.27$ (b) | $96.49 \pm 0.71$ (b) | $1.63 \times 10^{-2} \pm 1.84 \times 10^{-3}$ (a) | $2.83 \times 10^{-1} \pm 6.76 \times 10^{-3}$ (b) | $1.47 \times 10^{-2} \pm 3.02 \times 10^{-4}$ (b) |
| 0                 | $2.41 \pm 0.44$ (a)                   | $0 \pm 0$ (a)       | $62.69 \pm 0.09$ (c) | $7.84 \pm 0.09$ (a) | $94.62 \pm 0.28$ (b) | $83.37 \pm 0.97$ (c) | $88.78 \pm 0.37$ (c) | $0 \pm 0$ (a)                                     | $2.41 \times 10^{-1} \pm 4.64 \times 10^{-4}$ (c) | $3.01 \times 10^{-2} \pm 2.51 \times 10^{-4}$ (a) |

$C_{ETH}$ : ethanol concentration;  $C_{ERY}$ : erythritol concentration;  $C_{GLY}$ : glycerol concentration;  $\Delta G$ : glucose consumption,  $\Delta F$ : fructose consumption,  $\Delta S$ : total sugar consumption,  $Y_{ETH}$ : ethanol yield,  $Y_{ERY}$ : erythritol yield,  $Y_{GLY}$ : glycerol yield.

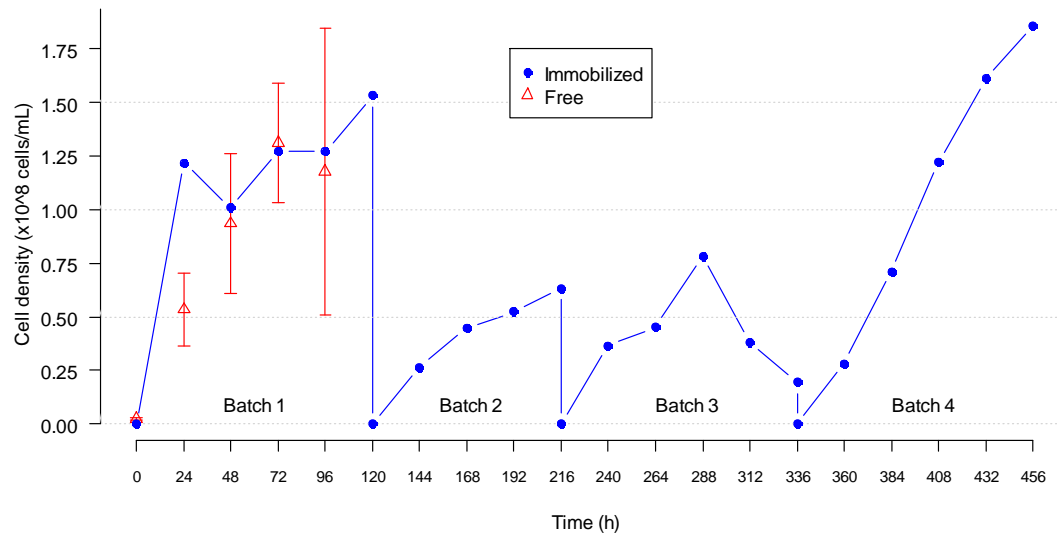

**Figure S3.** Cell density in the liquid medium of the bioreactor during the four consecutive immobilization batches (filled circles). The values of the free-cell fermentation are shown for comparison (empty triangles).
